# Supplementary material for: An examination of the Devonian fishes of Michigan
Source: PeerJ. 2018 Sep 20;6:e5636. doi: 10.7717/peerj.5636 (PMC6151260; doi:10.7717/peerj.5636)
Supplement: Supplemental Information 2 [file peerj-06-5636-s006.xlsx]

## Sheet: Sheet1
Specimen Number	Identification	Locality	Formation	Deposit Site
2M	Mylostoma? sp.	NW Michigan: Southern Shore of Betsie Lake near the Bay: adjacent to Waterfront Park. Bruce Tobin Property. Rocks at the site are originally from the Specification Stone Products Quarry in Alpena, MI. Address: 1009 Long Lake Rd, Alpena, MI 49707.	Four Mile Dam	Michigan History Museum
JS 4	Unidentified Placoderm	NW Michigan: Southern Shore of Betsie Lake near the Bay: adjacent to Waterfront Park. Bruce Tobin Property. Rocks at the site are originally from the Specification Stone Products Quarry in Alpena, MI. Address: 1009 Long Lake Rd, Alpena, MI 49707.	Four Mile Dam	Michigan History Museum
5M	Mylostoma? sp.	NW Michigan: Southern Shore of Betsie Lake near the Bay: adjacent to Waterfront Park. Bruce Tobin Property. Rocks at the site are originally from the Specification Stone Products Quarry in Alpena, MI. Address: 1009 Long Lake Rd, Alpena, MI 49707.	Four Mile Dam	Michigan History Museum
1M	Mylostoma? sp.	NW Michigan: Southern Shore of Betsie Lake near the Bay: adjacent to Waterfront Park. Bruce Tobin Property. Rocks at the site are originally from the Specification Stone Products Quarry in Alpena, MI. Address: 1009 Long Lake Rd, Alpena, MI 49707.	Four Mile Dam	Michigan History Museum
6M	Mylostoma? sp.	NW Michigan: Southern Shore of Betsie Lake near the Bay: adjacent to Waterfront Park. Bruce Tobin Property. Rocks at the site are originally from the Specification Stone Products Quarry in Alpena, MI. Address: 1009 Long Lake Rd, Alpena, MI 49707.	Four Mile Dam	Michigan History Museum
8M	Mylostoma? sp.	NW Michigan: Southern Shore of Betsie Lake near the Bay: adjacent to Waterfront Park. Bruce Tobin Property. Rocks at the site are originally from the Specification Stone Products Quarry in Alpena, MI. Address: 1009 Long Lake Rd, Alpena, MI 49707.	Four Mile Dam	Michigan History Museum
9M	Mylostoma? sp.	NW Michigan: Southern Shore of Betsie Lake near the Bay: adjacent to Waterfront Park. Bruce Tobin Property. Rocks at the site are originally from the Specification Stone Products Quarry in Alpena, MI. Address: 1009 Long Lake Rd, Alpena, MI 49707.	Four Mile Dam	Michigan History Museum
11M	Mylostoma? sp.	NW Michigan: Southern Shore of Betsie Lake near the Bay: adjacent to Waterfront Park. Bruce Tobin Property. Rocks at the site are originally from the Specification Stone Products Quarry in Alpena, MI. Address: 1009 Long Lake Rd, Alpena, MI 49707.	Four Mile Dam	Michigan History Museum
15M	Mylostoma? sp.	Abandoned Kelly Island Limestone Quarry at Rockport State Park, Alpena County	Rockport Quarry Limestone	Michigan History Museum
18M	Mylostoma? sp.	NW Michigan: Southern Shore of Betsie Lake near the Bay: adjacent to Waterfront Park. Bruce Tobin Property. Rocks at the site are originally from the Specification Stone Products Quarry in Alpena, MI. Address: 1009 Long Lake Rd, Alpena, MI 49707.	Four Mile Dam	Michigan History Museum
21M	Mylostoma? sp.	NW Michigan: Southern Shore of Betsie Lake near the Bay: adjacent to Waterfront Park. Bruce Tobin Property. Rocks at the site are originally from the Specification Stone Products Quarry in Alpena, MI. Address: 1009 Long Lake Rd, Alpena, MI 49707.	Four Mile Dam	Michigan History Museum
29M	Mylostoma? sp.	NW Michigan: Southern Shore of Betsie Lake near the Bay: adjacent to Waterfront Park. Bruce Tobin Property. Rocks at the site are originally from the Specification Stone Products Quarry in Alpena, MI. Address: 1009 Long Lake Rd, Alpena, MI 49707.	Four Mile Dam	Michigan History Museum
32M	Macropetalichthy? sp.	NW Michigan: Southern Shore of Betsie Lake near the Bay: adjacent to Waterfront Park. Bruce Tobin Property. Rocks at the site are originally from the Specification Stone Products Quarry in Alpena, MI. Address: 1009 Long Lake Rd, Alpena, MI 49707.	Four Mile Dam	Michigan History Museum
7M	Protitanichthys rockportensis	Abandoned Kelly Island Limestone Quarry at Rockport State Park, Alpena County	Rockport Quarry Limestone	Michigan History Museum
16M	Protitanichthys rockportensis	Abandoned Kelly Island Limestone Quarry at Rockport State Park, Alpena County	Rockport Quarry Limestone	Michigan History Museum
5M	Protitanichthys rockportensis	Abandoned Kelly Island Limestone Quarry at Rockport State Park, Alpena County	Rockport Quarry Limestone	Michigan History Museum
13M	Protitanichthys rockportensis	Abandoned Kelly Island Limestone Quarry at Rockport State Park, Alpena County	Rockport Quarry Limestone	Michigan History Museum
15M	Mylostoma? sp.	Abandoned Kelly Island Limestone Quarry at Rockport State Park, Alpena County	Rockport Quarry Limestone	Michigan History Museum
11M	Holonema and Protitanichthys rockportensis	Abandoned Kelly Island Limestone Quarry at Rockport State Park, Alpena County	Rockport Quarry Limestone	Michigan History Museum
1M	Holonema sp.	Abandoned Kelly Island Limestone Quarry at Rockport State Park, Alpena County	Rockport Quarry Limestone	Michigan History Museum
4M	Protitanichthys rockportensis?	Abandoned Kelly Island Limestone Quarry at Rockport State Park, Alpena County	Rockport Quarry Limestone	Michigan History Museum
13M	Unidentified Placoderm	Abandoned Kelly Island Limestone Quarry at Rockport State Park, Alpena County	Rockport Quarry Limestone	Michigan History Museum
UMMP 4169	Eczematolepis? sp.	Near Posen, Presque Isle County	Genshaw Formation	University of Michigan Museum of Paleontology
UMMP 14320	Macropetalichthys? sp.	Near Trenton, Wayne County	Dundee Limestone	University of Michigan Museum of Paleontology
UMMP 26114	Titanichthys? sp.	Sibley Quarry, Wyandotte, Wayne County.	Dundee Limestone	University of Michigan Museum of Paleontology
UMMP 13052	Protitanichthys rockportensis	Abandoned Kelly Island Limestone Quarry at Rockport State Park, Alpena County	Rockport Quarry Limestone	University of Michigan Museum of Paleontology
UMMP 18206	Trachosteus? clarkii	1.6 kilometers north of Norwood, Charlevoix County	Antrim Shale	University of Michigan Museum of Paleontology
UMMP 3899	Holonema rugosum?	French Road near Long Lake, near Rockport, Alpena County.	Killians Member of the Genshaw Formation	University of Michigan Museum of Paleontology
UMMP 3898	Holonema rugosum?	Abandoned Kelly Island Limestone Quarry at Rockport State Park, Alpena County	Rockport Quarry Limestone	University of Michigan Museum of Paleontology
UMMP 3127	Aspidichthys sp.	Shore of Grand Traverse Bay near Norwood, Charlevoix County.	Antrim Shale	University of Michigan Museum of Paleontology
UMMP 13612	Mylostoma? sp.	Abandoned Kelly Island Limestone Quarry at Rockport State Park, Alpena County	Rockport Quarry Limestone	University of Michigan Museum of Paleontology
UMMP 14321	Ptyctodus sp.	Near Trenton, Wayne County	Dundee Limestone?	University of Michigan Museum of Paleontology
UMMP 14712	Ptyctodus sp.	"Quarry floor just west of Petoskey", Emmet County	Unknown formation in the Traverse Group	University of Michigan Museum of Paleontology
UMMP 21718	Ptyctodus sp.	"old Wamer's Brickyard southwest of Alpena", Alpena County.	Potter Farm Formation?	University of Michigan Museum of Paleontology
UMMP 16157	Ptyctodus sp.	Loose block in Alkali Quarry, Alpena	Alpena Limestone	University of Michigan Museum of Paleontology
UMMP 21817	Ptyctodus sp.	West edge of Alpena Cemetery, Alpena	Potter Farm Formation	University of Michigan Museum of Paleontology
UMMP 13045	Ptyctodus sp.	Abandoned Kelly Island Limestone Quarry at Rockport State Park, Alpena County	Rockport Quarry Limestone	University of Michigan Museum of Paleontology
UMMP 3023	Ptyctodus sp.	The bluffs on the northeast shore of Partridge Point, 6.4 kilometers south of Alpena.	Thunder Bay Limestone	University of Michigan Museum of Paleontology
UMMP 14460	Ptyctodus sp.	Rogers City, Presque Isle County	Bell Shale	University of Michigan Museum of Paleontology
UMMP 4065	Protitanichthys rockportensis	Abandoned Kelly Island Limestone Quarry at Rockport State Park, Alpena County	Rockport Quarry Limestone	University of Michigan Museum of Paleontology
UMMP 13536	Protitanichthys rockportensis	Abandoned Kelly Island Limestone Quarry at Rockport State Park, Alpena County	Rockport Quarry Limestone	University of Michigan Museum of Paleontology
UMMP 13049	Protitanichthys rockportensis	Abandoned Kelly Island Limestone Quarry at Rockport State Park, Alpena County	Rockport Quarry Limestone	University of Michigan Museum of Paleontology
UMMP 3842	Protitanichthys rockportensis	Abandoned Kelly Island Limestone Quarry at Rockport State Park, Alpena County	Rockport Quarry Limestone	University of Michigan Museum of Paleontology
UMMP 13046	Protitanichthys rockportensis	Abandoned Kelly Island Limestone Quarry at Rockport State Park, Alpena County	Rockport Quarry Limestone	University of Michigan Museum of Paleontology
UMMP 12975	Protitanichthys rockportensis	Abandoned Kelly Island Limestone Quarry at Rockport State Park, Alpena County	Rockport Quarry Limestone	University of Michigan Museum of Paleontology
UMMP 13044	Protitanichthys rockportensis	Abandoned Kelly Island Limestone Quarry at Rockport State Park, Alpena County	Rockport Quarry Limestone	University of Michigan Museum of Paleontology
UMMP 13503	Protitanichthys rockportensis	Abandoned Kelly Island Limestone Quarry at Rockport State Park, Alpena County	Rockport Quarry Limestone	University of Michigan Museum of Paleontology
UMMP 13054	Protitanichthys rockportensis	Abandoned Kelly Island Limestone Quarry at Rockport State Park, Alpena County	Rockport Quarry Limestone	University of Michigan Museum of Paleontology
UMMP 12976	Protitanichthys rockportensis	Abandoned Kelly Island Limestone Quarry at Rockport State Park, Alpena County	Rockport Quarry Limestone	University of Michigan Museum of Paleontology
UMMP 12977	Protitanichthys rockportensis	Abandoned Kelly Island Limestone Quarry at Rockport State Park, Alpena County	Rockport Quarry Limestone	University of Michigan Museum of Paleontology
UMMP 12978	Protitanichthys rockportensis	Abandoned Kelly Island Limestone Quarry at Rockport State Park, Alpena County	Rockport Quarry Limestone	University of Michigan Museum of Paleontology
UMMP 12979	Protitanichthys rockportensis	Abandoned Kelly Island Limestone Quarry at Rockport State Park, Alpena County	Rockport Quarry Limestone	University of Michigan Museum of Paleontology
UMMP 12980	Protitanichthys rockportensis	Abandoned Kelly Island Limestone Quarry at Rockport State Park, Alpena County	Rockport Quarry Limestone	University of Michigan Museum of Paleontology
UMMP 12981	Protitanichthys rockportensis	Abandoned Kelly Island Limestone Quarry at Rockport State Park, Alpena County	Rockport Quarry Limestone	University of Michigan Museum of Paleontology
UMMP 12982	Protitanichthys rockportensis	Abandoned Kelly Island Limestone Quarry at Rockport State Park, Alpena County	Rockport Quarry Limestone	University of Michigan Museum of Paleontology
UMMP 12983	Protitanichthys rockportensis	Abandoned Kelly Island Limestone Quarry at Rockport State Park, Alpena County	Rockport Quarry Limestone	University of Michigan Museum of Paleontology
UMMP 12984	Protitanichthys rockportensis	Abandoned Kelly Island Limestone Quarry at Rockport State Park, Alpena County	Rockport Quarry Limestone	University of Michigan Museum of Paleontology
UMMP 12985	Protitanichthys rockportensis	Abandoned Kelly Island Limestone Quarry at Rockport State Park, Alpena County	Rockport Quarry Limestone	University of Michigan Museum of Paleontology
UMMP 12986	Protitanichthys rockportensis	Abandoned Kelly Island Limestone Quarry at Rockport State Park, Alpena County	Rockport Quarry Limestone	University of Michigan Museum of Paleontology
UMMP 14374	Unidentified Ptyctodont	Locality 650 of Winchell Survey, Alpena, Alepna County.	Unknown, Traverse Group	University of Michigan Museum of Paleontology
UMMP 22006	Onychodus sigmoides	London Township, Monroe County	Dundee Limestone	University of Michigan Museum of Paleontology
UMMP 26113	Onychodus sp.	Sibley Quarry, Wyandotte, Wayne County.	Dundee Limestone	University of Michigan Museum of Paleontology
UMMP 14370	Onychodus? sp.	South Point (Gravel Point), shore of Little Traverse Bay, Charlevoix County.	Gravel Point	University of Michigan Museum of Paleontology
UMMP 3130	Holonemiid	US Limestone and Chemical Company quarry, Rogers City, Presque Isle County.	Newton Creek Limestone (Koehler Limestone)	University of Michigan Museum of Paleontology
UMMP 3129	Holonemiid	South Point (Gravel Point), Little Traverse Bay, Charlevoix County	Gravel Point	University of Michigan Museum of Paleontology
UMMP 1329	Gyracanthus sp.	South Point (Gravel Point), Little Traverse Bay, Charlevoix County	Gravel Point	University of Michigan Museum of Paleontology
UMMP 26112	Machaeracanthus sp.	Sibley Quarry, Wyandotte, Wayne County.	Dundee Limestone	University of Michigan Museum of Paleontology
UMMP 26111	Machaeracanthus sp.	Sibley Quarry, Wyandotte, Wayne County.	Dundee Limestone	University of Michigan Museum of Paleontology
UMMP 47691	Machaeracanthus sp.	North edge of Onaway Stone Quarry, Presque Isle County.	Newton Creek Limestone (Koehler Limestone)	University of Michigan Museum of Paleontology
UMMP 47692	Machaeracanthus sp.	North edge of Onaway Stone Quarry, Presque Isle County.	Newton Creek Limestone (Koehler Limestone)	University of Michigan Museum of Paleontology
UMMP 3521	Machaeracanthus sp.	London Township, Monroe County	Dundee Limestone	University of Michigan Museum of Paleontology
UMMP 23495	Oracanthus sp.	Four Mile Dam about 6 kilometers northwest of Alpena, Alpena County.	Norway Point Formation	University of Michigan Museum of Paleontology
UMMP 13047	Machaeracanthus? sp.	Abandoned Kelly Island Limestone Quarry at Rockport State Park, Alpena County	Rockport Quarry Limestone	University of Michigan Museum of Paleontology
UMMP 26523	Acondylacanthus gracillimus	Dundee Limestone, Sibley Quarry, Wyandotte, Wayne County.	Dundee Limestone	University of Michigan Museum of Paleontology
UMMP 46648	Holonema farrowi	North edge of Onaway Stone Quarry, Presque Isle County.	Newton Creek Limestone (Koehler Limestone)	University of Michigan Museum of Paleontology
UMMP 46647	Holonema farrowi	North edge of Onaway Stone Quarry, Presque Isle County.	Newton Creek Limestone (Koehler Limestone)	University of Michigan Museum of Paleontology
UMMP 13147	Tamiobatis? sp.	Abandoned Kelly Island Limestone Quarry at Rockport State Park, Alpena County	Rockport Quarry Limestone	University of Michigan Museum of Paleontology
UMMP 3843	Holonema sp.	Abandoned Kelly Island Limestone Quarry at Rockport State Park, Alpena County	Rockport Quarry Limestone	University of Michigan Museum of Paleontology
UMMP 12987	Holonema sp.	Abandoned Kelly Island Limestone Quarry at Rockport State Park, Alpena County	Rockport Quarry Limestone	University of Michigan Museum of Paleontology
UMMP 12988	Holonema sp.	Abandoned Kelly Island Limestone Quarry at Rockport State Park, Alpena County	Rockport Quarry Limestone	University of Michigan Museum of Paleontology
UMMP 12989	Holonema sp.	Abandoned Kelly Island Limestone Quarry at Rockport State Park, Alpena County	Rockport Quarry Limestone	University of Michigan Museum of Paleontology
UMMP 12991	Holonema sp.	Abandoned Kelly Island Limestone Quarry at Rockport State Park, Alpena County	Rockport Quarry Limestone	University of Michigan Museum of Paleontology
UMMP 12992	Holonema sp.	Abandoned Kelly Island Limestone Quarry at Rockport State Park, Alpena County	Rockport Quarry Limestone	University of Michigan Museum of Paleontology
UMMP 13040	Holonema sp.	Abandoned Kelly Island Limestone Quarry at Rockport State Park, Alpena County	Rockport Quarry Limestone	University of Michigan Museum of Paleontology
UMMP 13043	Holonema sp.	Abandoned Kelly Island Limestone Quarry at Rockport State Park, Alpena County	Rockport Quarry Limestone	University of Michigan Museum of Paleontology
UMMP 14048	Holonema sp.	Abandoned Kelly Island Limestone Quarry at Rockport State Park, Alpena County	Rockport Quarry Limestone	University of Michigan Museum of Paleontology
UMMP 13050	Holonema sp.	Abandoned Kelly Island Limestone Quarry at Rockport State Park, Alpena County	Rockport Quarry Limestone	University of Michigan Museum of Paleontology
UMMP 13051	Holonema sp.	Abandoned Kelly Island Limestone Quarry at Rockport State Park, Alpena County	Rockport Quarry Limestone	University of Michigan Museum of Paleontology
UMMP 15439	Holonema sp.	Abandoned Kelly Island Limestone Quarry at Rockport State Park, Alpena County	Rockport Quarry Limestone	University of Michigan Museum of Paleontology
UMMP 16152	Dunkleosteus sp.	Alkali Quarry, Alpena	Alpena Limestone	University of Michigan Museum of Paleontology
UMMP 16156	Dunkleosteus sp.	Abandoned Kelly Island Limestone Quarry at Rockport State Park, Alpena County	Rockport Quarry Limestone	University of Michigan Museum of Paleontology
UMMP 15432	Dunkleosteus sp.	Squaw Bay, 6.4 kilometers south of Alpena on U.S 23.	Antrim Shale	University of Michigan Museum of Paleontology
UMMP 3046	Dinomylostoma sp.	Abandoned Kelly Island Limestone Quarry at Rockport State Park, Alpena County	Rockport Quarry Limestone	University of Michigan Museum of Paleontology
UMMP 12974	Dinomylostoma sp.	Abandoned Kelly Island Limestone Quarry at Rockport State Park, Alpena County	Rockport Quarry Limestone	University of Michigan Museum of Paleontology
UMMP 13042	Dinomylostoma sp.	Abandoned Kelly Island Limestone Quarry at Rockport State Park, Alpena County	Rockport Quarry Limestone	University of Michigan Museum of Paleontology
UMMP 13056	Dinomylostoma sp.	Abandoned Kelly Island Limestone Quarry at Rockport State Park, Alpena County	Rockport Quarry Limestone	University of Michigan Museum of Paleontology
UMMP 13148	Dinomylostoma sp.	Abandoned Kelly Island Limestone Quarry at Rockport State Park, Alpena County	Rockport Quarry Limestone	University of Michigan Museum of Paleontology
UMMP 16158	Dinomylostoma sp.	Abandoned Kelly Island Limestone Quarry at Rockport State Park, Alpena County	Rockport Quarry Limestone	University of Michigan Museum of Paleontology
UMMP 13041	Dinomylostoma sp.	Abandoned Kelly Island Limestone Quarry at Rockport State Park, Alpena County	Rockport Quarry Limestone	University of Michigan Museum of Paleontology
JS 41	Holonema sp.	Abandoned Kelly Island Limestone Quarry at Rockport State Park, Alpena County	Rockport Quarry Limestone	Michigan History Museum
JS 49	Protitanichthys rockportensis?	Abandoned Kelly Island Limestone Quarry at Rockport State Park, Alpena County	Rockport Quarry Limestone	Michigan History Museum
JS 60	Protitanichthys rockportensis	Abandoned Kelly Island Limestone Quarry at Rockport State Park, Alpena County	Rockport Quarry Limestone	Michigan History Museum
JS 54	Protitanichthys rockportensis	Abandoned Kelly Island Limestone Quarry at Rockport State Park, Alpena County	Rockport Quarry Limestone	Michigan History Museum
JS 58	Protitanichthys rockportensis	Abandoned Kelly Island Limestone Quarry at Rockport State Park, Alpena County	Rockport Quarry Limestone	Michigan History Museum
JS 64	Protitanichthys rockportensis	Abandoned Kelly Island Limestone Quarry at Rockport State Park, Alpena County	Rockport Quarry Limestone	Michigan History Museum
JS 63	Protitanichthys rockportensis	Abandoned Kelly Island Limestone Quarry at Rockport State Park, Alpena County	Rockport Quarry Limestone	Michigan History Museum
JS 80	Protitanichthys rockportensis	Abandoned Kelly Island Limestone Quarry at Rockport State Park, Alpena County	Rockport Quarry Limestone	Michigan History Museum
JS 76	Protitanichthys rockportensis	Abandoned Kelly Island Limestone Quarry at Rockport State Park, Alpena County	Rockport Quarry Limestone	Michigan History Museum
JS 48	Protitanichthys rockportensis	Abandoned Kelly Island Limestone Quarry at Rockport State Park, Alpena County	Rockport Quarry Limestone	Michigan History Museum
JS 111	Protitanichthys rockportensis	Abandoned Kelly Island Limestone Quarry at Rockport State Park, Alpena County	Rockport Quarry Limestone	Michigan History Museum
JS 104	Protitanichthys rockportensis?	Abandoned Kelly Island Limestone Quarry at Rockport State Park, Alpena County	Rockport Quarry Limestone	Michigan History Museum
JS 100	Protitanichthys rockportensis, Holonema sp., Protitanichthys rockportensis?	Abandoned Kelly Island Limestone Quarry at Rockport State Park, Alpena County	Rockport Quarry Limestone	Michigan History Museum
JS 115	Protitanichthys rockportensis	Abandoned Kelly Island Limestone Quarry at Rockport State Park, Alpena County	Rockport Quarry Limestone	Michigan History Museum
JS 116	Protitanichthys rockportensis	Abandoned Kelly Island Limestone Quarry at Rockport State Park, Alpena County	Rockport Quarry Limestone	Michigan History Museum
JS 122	Protitanichthys rockportensis	Abandoned Kelly Island Limestone Quarry at Rockport State Park, Alpena County	Rockport Quarry Limestone	Michigan History Museum
JS 123	Protitanichthys rockportensis	Abandoned Kelly Island Limestone Quarry at Rockport State Park, Alpena County	Rockport Quarry Limestone	Michigan History Museum
JS 124	Protitanichthys rockportensis	Abandoned Kelly Island Limestone Quarry at Rockport State Park, Alpena County	Rockport Quarry Limestone	Michigan History Museum
JS 125	Protitanichthys rockportensis	Abandoned Kelly Island Limestone Quarry at Rockport State Park, Alpena County	Rockport Quarry Limestone	Michigan History Museum
JS 130	Protitanichthys rockportensis	Abandoned Kelly Island Limestone Quarry at Rockport State Park, Alpena County	Rockport Quarry Limestone	Michigan History Museum
JS 133	Protitanichthys rockportensis	Abandoned Kelly Island Limestone Quarry at Rockport State Park, Alpena County	Rockport Quarry Limestone	Michigan History Museum
JS 61	Protitanichthys rockportensis, Holonema, and Protitanichthys rockportensis?	Abandoned Kelly Island Limestone Quarry at Rockport State Park, Alpena County	Rockport Quarry Limestone	Michigan History Museum
JS 45	Holonema	Abandoned Kelly Island Limestone Quarry at Rockport State Park, Alpena County	Rockport Quarry Limestone	Michigan History Museum
JS 41	Holonema	Abandoned Kelly Island Limestone Quarry at Rockport State Park, Alpena County	Rockport Quarry Limestone	Michigan History Museum
JS 68	Protitanichthys rockportensis	Abandoned Kelly Island Limestone Quarry at Rockport State Park, Alpena County	Rockport Quarry Limestone	Michigan History Museum
JS 47	Holonema sp.	Abandoned Kelly Island Limestone Quarry at Rockport State Park, Alpena County	Rockport Quarry Limestone	Michigan History Museum
JS 42	Protitanichthys rockportensis	Abandoned Kelly Island Limestone Quarry at Rockport State Park, Alpena County	Rockport Quarry Limestone	Michigan History Museum
JS 50	Holonema sp.	Abandoned Kelly Island Limestone Quarry at Rockport State Park, Alpena County	Rockport Quarry Limestone	Michigan History Museum
JS 69	Protitanichthys rockportensis	Abandoned Kelly Island Limestone Quarry at Rockport State Park, Alpena County	Rockport Quarry Limestone	Michigan History Museum
JS 65	Holonema sp.	Abandoned Kelly Island Limestone Quarry at Rockport State Park, Alpena County	Rockport Quarry Limestone	Michigan History Museum
JS 145	Holonema sp.	Abandoned Kelly Island Limestone Quarry at Rockport State Park, Alpena County	Rockport Quarry Limestone	Michigan History Museum
JS 146	Holonema sp.	Abandoned Kelly Island Limestone Quarry at Rockport State Park, Alpena County	Rockport Quarry Limestone	Michigan History Museum
JS 2	Holonema sp.	Abandoned Kelly Island Limestone Quarry at Rockport State Park, Alpena County	Rockport Quarry Limestone	Michigan History Museum
JS 150	Protitanichthys rockportensis	Abandoned Kelly Island Limestone Quarry at Rockport State Park, Alpena County	Rockport Quarry Limestone	Michigan History Museum
JS 110	Holonema sp.	Abandoned Kelly Island Limestone Quarry at Rockport State Park, Alpena County	Rockport Quarry Limestone	Michigan History Museum
JS 151	Protitanichthys rockportensis	Abandoned Kelly Island Limestone Quarry at Rockport State Park, Alpena County	Rockport Quarry Limestone	Michigan History Museum
JS 10	Holonema sp.	Abandoned Kelly Island Limestone Quarry at Rockport State Park, Alpena County	Rockport Quarry Limestone	Michigan History Museum
JS 19	Mylostoma? sp.	NW Michigan: Southern Shore of Betsie Lake near the Bay: adjacent to Waterfront Park. Bruce Tobin Property. Rocks at the site are originally from the Specification Stone Products Quarry in Alpena, MI. Address: 1009 Long Lake Rd, Alpena, MI 49707.	Four Mile Dam	Michigan History Museum
JS 25	Mylostoma? sp.	NW Michigan: Southern Shore of Betsie Lake near the Bay: adjacent to Waterfront Park. Bruce Tobin Property. Rocks at the site are originally from the Specification Stone Products Quarry in Alpena, MI. Address: 1009 Long Lake Rd, Alpena, MI 49707.	Four Mile Dam	Michigan History Museum
JS 13	Mylostoma? sp.	NW Michigan: Southern Shore of Betsie Lake near the Bay: adjacent to Waterfront Park. Bruce Tobin Property. Rocks at the site are originally from the Specification Stone Products Quarry in Alpena, MI. Address: 1009 Long Lake Rd, Alpena, MI 49707.	Four Mile Dam	Michigan History Museum
7--2--1A	Mylostoma? sp.	NW Michigan: Southern Shore of Betsie Lake near the Bay: adjacent to Waterfront Park. Bruce Tobin Property. Rocks at the site are originally from the Specification Stone Products Quarry in Alpena, MI. Address: 1009 Long Lake Rd, Alpena, MI 49707.	Four Mile Dam	Michigan History Museum
	Mylostoma? sp.	NW Michigan: Southern Shore of Betsie Lake near the Bay: adjacent to Waterfront Park. Bruce Tobin Property. Rocks at the site are originally from the Specification Stone Products Quarry in Alpena, MI. Address: 1009 Long Lake Rd, Alpena, MI 49707.	Four Mile Dam	Michigan History Museum
JS 113	Mylostoma? sp.	NW Michigan: Southern Shore of Betsie Lake near the Bay: adjacent to Waterfront Park. Bruce Tobin Property. Rocks at the site are originally from the Specification Stone Products Quarry in Alpena, MI. Address: 1009 Long Lake Rd, Alpena, MI 49707.	Four Mile Dam	Michigan History Museum
JS 119	Mylostoma? sp.	NW Michigan: Southern Shore of Betsie Lake near the Bay: adjacent to Waterfront Park. Bruce Tobin Property. Rocks at the site are originally from the Specification Stone Products Quarry in Alpena, MI. Address: 1009 Long Lake Rd, Alpena, MI 49707.	Four Mile Dam	Michigan History Museum
JS 145	Holonema sp.	Abandoned Kelly Island Limestone Quarry at Rockport State Park, Alpena County	Rockport Quarry Limestone	Michigan History Museum
JS 146	Holonema sp.	Abandoned Kelly Island Limestone Quarry at Rockport State Park, Alpena County	Rockport Quarry Limestone	Michigan History Museum
7--2--2	Mylostoma? sp.	NW Michigan: Southern Shore of Betsie Lake near the Bay: adjacent to Waterfront Park. Bruce Tobin Property. Rocks at the site are originally from the Specification Stone Products Quarry in Alpena, MI. Address: 1009 Long Lake Rd, Alpena, MI 49707.	Four Mile Dam	Michigan History Museum
JS 33	Mylostoma? sp.	NW Michigan: Southern Shore of Betsie Lake near the Bay: adjacent to Waterfront Park. Bruce Tobin Property. Rocks at the site are originally from the Specification Stone Products Quarry in Alpena, MI. Address: 1009 Long Lake Rd, Alpena, MI 49707.	Four Mile Dam	Michigan History Museum
BV 3	Mylostoma? sp.	Besser Museum Fossil Park	Alpena Limestone	Michigan History Museum
BV 7	Mylostoma? sp.	Besser Museum Fossil Park	Alpena Limestone	Michigan History Museum
BV 6	Mylostoma? sp.	Besser Museum Fossil Park	Alpena Limestone	Michigan History Museum
BV 4	Macropetalichthys? sp.	Besser Museum Fossil Park	Alpena Limestone	Michigan History Museum
JS 75	Mylostoma? sp.	NW Michigan: Southern Shore of Betsie Lake near the Bay: adjacent to Waterfront Park. Bruce Tobin Property. Rocks at the site are originally from the Specification Stone Products Quarry in Alpena, MI. Address: 1009 Long Lake Rd, Alpena, MI 49707.	Four Mile Dam	Michigan History Museum
JS 72	Mylostoma? sp.	NW Michigan: Southern Shore of Betsie Lake near the Bay: adjacent to Waterfront Park. Bruce Tobin Property. Rocks at the site are originally from the Specification Stone Products Quarry in Alpena, MI. Address: 1009 Long Lake Rd, Alpena, MI 49707.	Four Mile Dam	Michigan History Museum
JS 77	Mylostoma? sp.	NW Michigan: Southern Shore of Betsie Lake near the Bay: adjacent to Waterfront Park. Bruce Tobin Property. Rocks at the site are originally from the Specification Stone Products Quarry in Alpena, MI. Address: 1009 Long Lake Rd, Alpena, MI 49707.	Four Mile Dam	Michigan History Museum
JS 105	Mylostoma? sp.	NW Michigan: Southern Shore of Betsie Lake near the Bay: adjacent to Waterfront Park. Bruce Tobin Property. Rocks at the site are originally from the Specification Stone Products Quarry in Alpena, MI. Address: 1009 Long Lake Rd, Alpena, MI 49707.	Four Mile Dam	Michigan History Museum
JS 112	Mylostoma? sp.	NW Michigan: Southern Shore of Betsie Lake near the Bay: adjacent to Waterfront Park. Bruce Tobin Property. Rocks at the site are originally from the Specification Stone Products Quarry in Alpena, MI. Address: 1009 Long Lake Rd, Alpena, MI 49707.	Four Mile Dam	Michigan History Museum
JS 73	Mylostoma? sp.	NW Michigan: Southern Shore of Betsie Lake near the Bay: adjacent to Waterfront Park. Bruce Tobin Property. Rocks at the site are originally from the Specification Stone Products Quarry in Alpena, MI. Address: 1009 Long Lake Rd, Alpena, MI 49707.	Four Mile Dam	Michigan History Museum
JS 71	Mylostoma? sp.	NW Michigan: Southern Shore of Betsie Lake near the Bay: adjacent to Waterfront Park. Bruce Tobin Property. Rocks at the site are originally from the Specification Stone Products Quarry in Alpena, MI. Address: 1009 Long Lake Rd, Alpena, MI 49707.	Four Mile Dam	Michigan History Museum
JS 72	Mylostoma? sp.	NW Michigan: Southern Shore of Betsie Lake near the Bay: adjacent to Waterfront Park. Bruce Tobin Property. Rocks at the site are originally from the Specification Stone Products Quarry in Alpena, MI. Address: 1009 Long Lake Rd, Alpena, MI 49707.	Four Mile Dam	Michigan History Museum
JS 140	Mylostoma? sp.	NW Michigan: Southern Shore of Betsie Lake near the Bay: adjacent to Waterfront Park. Bruce Tobin Property. Rocks at the site are originally from the Specification Stone Products Quarry in Alpena, MI. Address: 1009 Long Lake Rd, Alpena, MI 49707.	Four Mile Dam	Michigan History Museum
JS 105	Mylostoma? sp.	NW Michigan: Southern Shore of Betsie Lake near the Bay: adjacent to Waterfront Park. Bruce Tobin Property. Rocks at the site are originally from the Specification Stone Products Quarry in Alpena, MI. Address: 1009 Long Lake Rd, Alpena, MI 49707.	Four Mile Dam	Michigan History Museum
JS 142	Mylostoma? sp.	NW Michigan: Southern Shore of Betsie Lake near the Bay: adjacent to Waterfront Park. Bruce Tobin Property. Rocks at the site are originally from the Specification Stone Products Quarry in Alpena, MI. Address: 1009 Long Lake Rd, Alpena, MI 49707.	Four Mile Dam	Michigan History Museum
JS 150	Mylostoma? sp.	NW Michigan: Southern Shore of Betsie Lake near the Bay: adjacent to Waterfront Park. Bruce Tobin Property. Rocks at the site are originally from the Specification Stone Products Quarry in Alpena, MI. Address: 1009 Long Lake Rd, Alpena, MI 49707.	Four Mile Dam	Michigan History Museum
JS 151	Mylostoma? sp.	NW Michigan: Southern Shore of Betsie Lake near the Bay: adjacent to Waterfront Park. Bruce Tobin Property. Rocks at the site are originally from the Specification Stone Products Quarry in Alpena, MI. Address: 1009 Long Lake Rd, Alpena, MI 49707.	Four Mile Dam	Michigan History Museum
JS 141	Mylostoma? sp.	NW Michigan: Southern Shore of Betsie Lake near the Bay: adjacent to Waterfront Park. Bruce Tobin Property. Rocks at the site are originally from the Specification Stone Products Quarry in Alpena, MI. Address: 1009 Long Lake Rd, Alpena, MI 49707.	Four Mile Dam	Michigan History Museum
JS 121	Unidentified Acanthodian	NW Michigan: Southern Shore of Betsie Lake near the Bay: adjacent to Waterfront Park. Bruce Tobin Property. Rocks at the site are originally from the Specification Stone Products Quarry in Alpena, MI. Address: 1009 Long Lake Rd, Alpena, MI 49707.	Four Mile Dam	Michigan History Museum
JS 120	Unidentified Acanthodian	NW Michigan: Southern Shore of Betsie Lake near the Bay: adjacent to Waterfront Park. Bruce Tobin Property. Rocks at the site are originally from the Specification Stone Products Quarry in Alpena, MI. Address: 1009 Long Lake Rd, Alpena, MI 49707.	Four Mile Dam	Michigan History Museum
JS 59	Mylostoma? sp.	NW Michigan: Southern Shore of Betsie Lake near the Bay: adjacent to Waterfront Park. Bruce Tobin Property. Rocks at the site are originally from the Specification Stone Products Quarry in Alpena, MI. Address: 1009 Long Lake Rd, Alpena, MI 49707.	Four Mile Dam	Michigan History Museum
JS 62	Mylostoma? sp.	NW Michigan: Southern Shore of Betsie Lake near the Bay: adjacent to Waterfront Park. Bruce Tobin Property. Rocks at the site are originally from the Specification Stone Products Quarry in Alpena, MI. Address: 1009 Long Lake Rd, Alpena, MI 49707.	Four Mile Dam	Michigan History Museum
JS 101	Protitanichthys rockportensis	NW Michigan: Southern Shore of Betsie Lake near the Bay: adjacent to Waterfront Park. Bruce Tobin Property. Rocks at the site are originally from the Specification Stone Products Quarry in Alpena, MI. Address: 1009 Long Lake Rd, Alpena, MI 49707.	Four Mile Dam	Michigan History Museum
JS 108	Mylostoma? sp.	NW Michigan: Southern Shore of Betsie Lake near the Bay: adjacent to Waterfront Park. Bruce Tobin Property. Rocks at the site are originally from the Specification Stone Products Quarry in Alpena, MI. Address: 1009 Long Lake Rd, Alpena, MI 49707.	Four Mile Dam	Michigan History Museum
7--3--2	Mylostoma? sp.	NW Michigan: Southern Shore of Betsie Lake near the Bay: adjacent to Waterfront Park. Bruce Tobin Property. Rocks at the site are originally from the Specification Stone Products Quarry in Alpena, MI. Address: 1009 Long Lake Rd, Alpena, MI 49707.	Four Mile Dam	Michigan History Museum
7--2--1B	Mylostoma? sp.	NW Michigan: Southern Shore of Betsie Lake near the Bay: adjacent to Waterfront Park. Bruce Tobin Property. Rocks at the site are originally from the Specification Stone Products Quarry in Alpena, MI. Address: 1009 Long Lake Rd, Alpena, MI 49707.	Four Mile Dam	Michigan History Museum
7--2--2	Mylostoma? sp.	NW Michigan: Southern Shore of Betsie Lake near the Bay: adjacent to Waterfront Park. Bruce Tobin Property. Rocks at the site are originally from the Specification Stone Products Quarry in Alpena, MI. Address: 1009 Long Lake Rd, Alpena, MI 49707.	Four Mile Dam	Michigan History Museum
7--3--3	Mylostoma? sp.	NW Michigan: Southern Shore of Betsie Lake near the Bay: adjacent to Waterfront Park. Bruce Tobin Property. Rocks at the site are originally from the Specification Stone Products Quarry in Alpena, MI. Address: 1009 Long Lake Rd, Alpena, MI 49707.	Four Mile Dam	Michigan History Museum
JS 118	Mylostoma? sp.	NW Michigan: Southern Shore of Betsie Lake near the Bay: adjacent to Waterfront Park. Bruce Tobin Property. Rocks at the site are originally from the Specification Stone Products Quarry in Alpena, MI. Address: 1009 Long Lake Rd, Alpena, MI 49707.	Four Mile Dam	Michigan History Museum
JS 111	Mylostoma? sp.	NW Michigan: Southern Shore of Betsie Lake near the Bay: adjacent to Waterfront Park. Bruce Tobin Property. Rocks at the site are originally from the Specification Stone Products Quarry in Alpena, MI. Address: 1009 Long Lake Rd, Alpena, MI 49707.	Four Mile Dam	Michigan History Museum
JS 28	Mylostoma? sp.	NW Michigan: Southern Shore of Betsie Lake near the Bay: adjacent to Waterfront Park. Bruce Tobin Property. Rocks at the site are originally from the Specification Stone Products Quarry in Alpena, MI. Address: 1009 Long Lake Rd, Alpena, MI 49707.	Four Mile Dam	Michigan History Museum
JS 26	Mylostoma? sp.	NW Michigan: Southern Shore of Betsie Lake near the Bay: adjacent to Waterfront Park. Bruce Tobin Property. Rocks at the site are originally from the Specification Stone Products Quarry in Alpena, MI. Address: 1009 Long Lake Rd, Alpena, MI 49707.	Four Mile Dam	Michigan History Museum
JS 142	Mylostoma? sp.	NW Michigan: Southern Shore of Betsie Lake near the Bay: adjacent to Waterfront Park. Bruce Tobin Property. Rocks at the site are originally from the Specification Stone Products Quarry in Alpena, MI. Address: 1009 Long Lake Rd, Alpena, MI 49707.	Four Mile Dam	Michigan History Museum
BV 5	Mylostoma? sp.	Besser Museum Fossil Park	Four Mile Dam	Michigan History Museum
VP.485	Holonema sp.	Abandoned Kelly Island Limestone Quarry at Rockport State Park, Alpena County	Rockport Quarry Limestone	Michigan State University Museum of Natural History
VP.487	Protitanichthys rockportensis	Abandoned Kelly Island Limestone Quarry at Rockport State Park, Alpena County	Rockport Quarry Limestone	Michigan State University Museum of Natural History
VP.489	Ptyctodus sp.	Afton Quarry, Cheboygan County	Unknown	Michigan State University Museum of Natural History
VP.517	Dunkleosteus sp.	Alpena	Unknown	Michigan State University Museum of Natural History
VP.522	Coccosteid	Abandoned Kelly Island Limestone Quarry at Rockport State Park, Alpena County	Rockport Quarry Limestone	Michigan State University Museum of Natural History
CMNH 50215	Diplognathus lafargei	Paxton Quarry (Lafarge North America, Inc., Alpena Cement Plant, Great Lakes Region), Alpena.	Antrim Shale	Cleveland Museum of Natural History
AE16I	Protitanichthys rockportensis	Abandoned Kelly Island Limestone Quarry at Rockport State Park, Alpena County.	Rockport Quarry Limestone	Michigan History Museum
AE16C	Protitanichthys rockportensis and Holonema	Abandoned Kelly Island Limestone Quarry at Rockport State Park, Alpena County.	Rockport Quarry Limestone	Michigan History Museum
AE16M	Protitanichthys rockportensis	Abandoned Kelly Island Limestone Quarry at Rockport State Park, Alpena County.	Rockport Quarry Limestone	Michigan History Museum
AE16H	Protitanichthys rockportensis	Abandoned Kelly Island Limestone Quarry at Rockport State Park, Alpena County.	Rockport Quarry Limestone	Michigan History Museum
AE16B	Holonema sp.	Abandoned Kelly Island Limestone Quarry at Rockport State Park, Alpena County.	Rockport Quarry Limestone	Michigan History Museum
AE16D	Protitanichthys rockportensis	Abandoned Kelly Island Limestone Quarry at Rockport State Park, Alpena County.	Rockport Quarry Limestone	Michigan History Museum
AE16K	Protitanichthys rockportensis	Abandoned Kelly Island Limestone Quarry at Rockport State Park, Alpena County.	Rockport Quarry Limestone	Michigan History Museum
AE16J	Protitanichthys rockportensis	Abandoned Kelly Island Limestone Quarry at Rockport State Park, Alpena County.	Rockport Quarry Limestone	Michigan History Museum
AE16L	Protitanichthys rockportensis	Abandoned Kelly Island Limestone Quarry at Rockport State Park, Alpena County.	Rockport Quarry Limestone	Michigan History Museum
AE16F	Protitanichthys rockportensis	Abandoned Kelly Island Limestone Quarry at Rockport State Park, Alpena County.	Rockport Quarry Limestone	Michigan History Museum
AE16A	Protitanichthys rockportensis and Holonema	Abandoned Kelly Island Limestone Quarry at Rockport State Park, Alpena County.	Rockport Quarry Limestone	Michigan History Museum
AE16E	Protitanichthys rockportensis and Holonema	Abandoned Kelly Island Limestone Quarry at Rockport State Park, Alpena County.	Rockport Quarry Limestone	Michigan History Museum
AE16G	Protitanichthys rockportensis	Abandoned Kelly Island Limestone Quarry at Rockport State Park, Alpena County.	Rockport Quarry Limestone	Michigan History Museum
AE16J	Protitanichthys rockportensis	Abandoned Kelly Island Limestone Quarry at Rockport State Park, Alpena County.	Rockport Quarry Limestone	Michigan History Museum
